# Supplementary material for: Simultaneous removal of PM and NOx over highly efficient 3DOM W/Ce0.8Zr0.2O2 catalysts
Source: Royal Society of Chemistry journal article supplement (doi:10.1039/c7ra11571g), 2017-01-01
Supplement: c7ra11571g1.pdf [file c7ra11571g1.pdf]

# Supporting information

## Simultaneous removal of PM and NO<sub>x</sub> over highly efficient 3DOM W/Ce<sub>0.8</sub>Zr<sub>0.2</sub>O<sub>2</sub> catalysts

Ying Cheng<sup>†</sup>, Weiyu Song<sup>†</sup>, Jian Liu\*, Zhen Zhao, Yuechang Wei

State Key Laboratory of Heavy Oil Processing, China University of Petroleum,  
Beijing 102249, China

\* Corresponding author: Email address: [liujian@cup.edu.cn](mailto:liujian@cup.edu.cn)

Postal Address: 18# Fuxue Road, Chang Ping District, Beijing, 102249, China,

Tel: 86-10-89732326, Fax: 86-10-69724721

<sup>†</sup> The both authors contributed equally to this work.

Table S1

Simultaneous NO<sub>x</sub> reduction and PM combustion over 3DOM catalysts (100 mg catalyst loosely mixed with 10 mg model PM; 1000 ppm NO, 1000 ppm NH<sub>3</sub>, 3 % O<sub>2</sub> and balance N<sub>2</sub> at a gas hourly space velocity of 25000 h<sup>-1</sup>).

| <b>Catalyst</b>                                           | <b>Temperature for maximum concentration CO<sub>2</sub></b> | <b>Temperature range for 100 % NO conversion</b> |
|-----------------------------------------------------------|-------------------------------------------------------------|--------------------------------------------------|
| Ce <sub>0.8</sub> Zr <sub>0.2</sub> O <sub>2</sub>        | 435                                                         | 390-498                                          |
| 0.5% W/Ce <sub>0.8</sub> Zr <sub>0.2</sub> O <sub>2</sub> | 421                                                         | 402-496                                          |
| 0.8% W/Ce <sub>0.8</sub> Zr <sub>0.2</sub> O <sub>2</sub> | 408                                                         | 378-492                                          |
| 1% W/Ce <sub>0.8</sub> Zr <sub>0.2</sub> O <sub>2</sub>   | 417                                                         | 388-476                                          |
| 3% W/Ce <sub>0.8</sub> Zr <sub>0.2</sub> O <sub>2</sub>   | 428                                                         | -                                                |
| 0.8% W/CeO <sub>2</sub>                                   | 445                                                         | 398-485                                          |
| 0.8% W/ZrO <sub>2</sub>                                   | 461                                                         | 472-526                                          |

Table S2

BET surface area of the different samples

| Samples                                                   | S <sub>BET</sub> (m <sup>2</sup> /g) |
|-----------------------------------------------------------|--------------------------------------|
| 0.8% W/CeO <sub>2</sub>                                   | 20.6                                 |
| 0.8% W/ZrO <sub>2</sub>                                   | 22.4                                 |
| 0.5% W/Ce <sub>0.8</sub> Zr <sub>0.2</sub> O <sub>2</sub> | 34.0                                 |
| 0.8% W/Ce <sub>0.8</sub> Zr <sub>0.2</sub> O <sub>2</sub> | 32.3                                 |
| 1% W/Ce <sub>0.8</sub> Zr <sub>0.2</sub> O <sub>2</sub>   | 31.4                                 |
| 3% W/Ce <sub>0.8</sub> Zr <sub>0.2</sub> O <sub>2</sub>   | 29.1                                 |

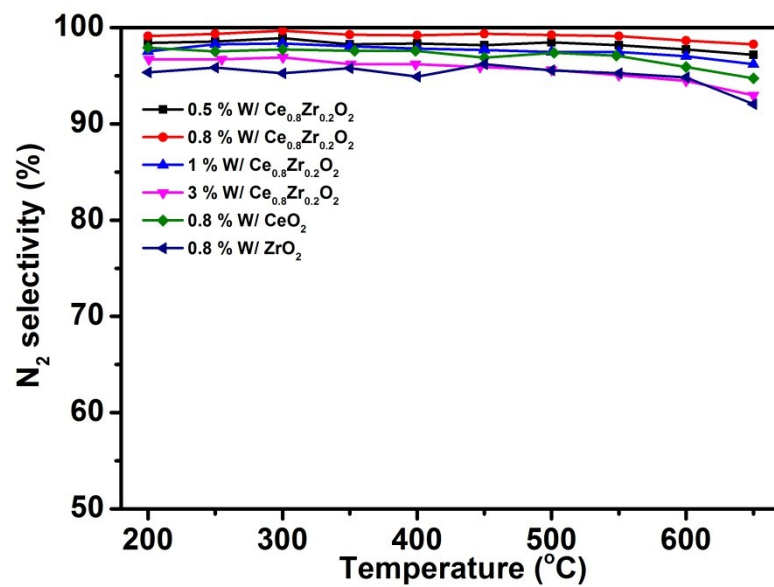

Figure S1. N<sub>2</sub> selectivity for 3DOM 0.8% W/CeO<sub>2</sub>, 0.8% W/ZrO<sub>2</sub> and x% W/Ce<sub>0.8</sub>Zr<sub>0.2</sub>O<sub>2</sub> catalysts

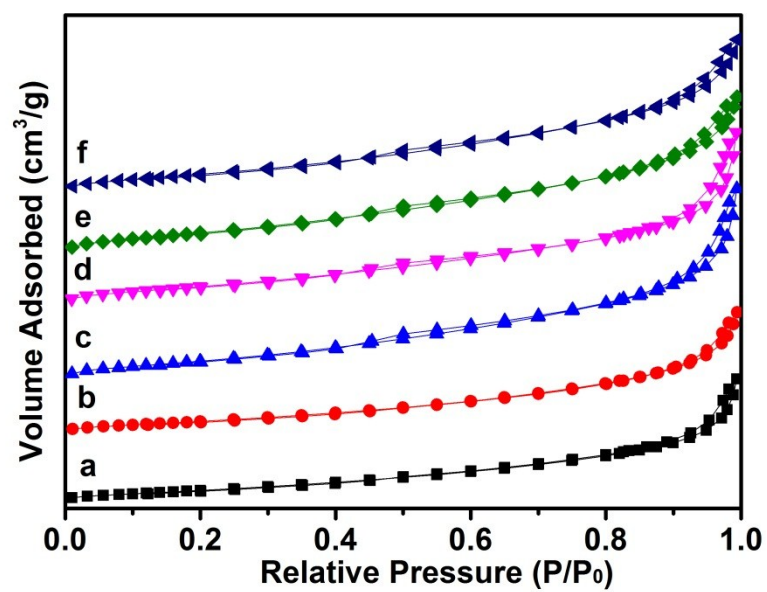

Figure S2. Nitrogen adsorption-desorption isotherms of 3DOM catalysts (a) 0.8% W/CeO<sub>2</sub> (b) 0.8% W/ZrO<sub>2</sub> (c) 0.5% W/Ce<sub>0.8</sub>Zr<sub>0.2</sub>O<sub>2</sub> (d) 0.8% W/Ce<sub>0.8</sub>Zr<sub>0.2</sub>O<sub>2</sub> (e) 1% W/Ce<sub>0.8</sub>Zr<sub>0.2</sub>O<sub>2</sub> (f) 3% W/Ce<sub>0.8</sub>Zr<sub>0.2</sub>O<sub>2</sub>

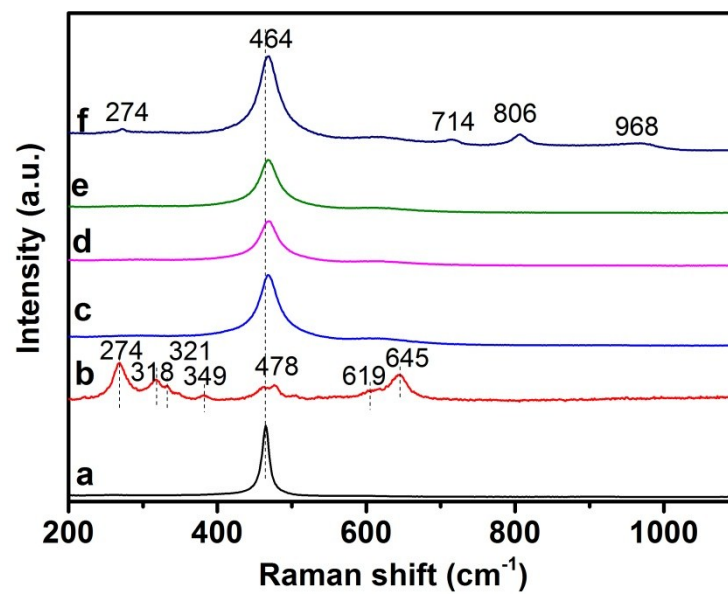

Figure S3. Raman spectra of 3DOM catalysts (a) 0.8% W/CeO<sub>2</sub> (b) 0.8% W/ZrO<sub>2</sub> (c) 0.5% W/Ce<sub>0.8</sub>Zr<sub>0.2</sub>O<sub>2</sub> (d) 0.8% W/Ce<sub>0.8</sub>Zr<sub>0.2</sub>O<sub>2</sub> (e) 1% W/Ce<sub>0.8</sub>Zr<sub>0.2</sub>O<sub>2</sub> (f) 3% W/Ce<sub>0.8</sub>Zr<sub>0.2</sub>O<sub>2</sub>

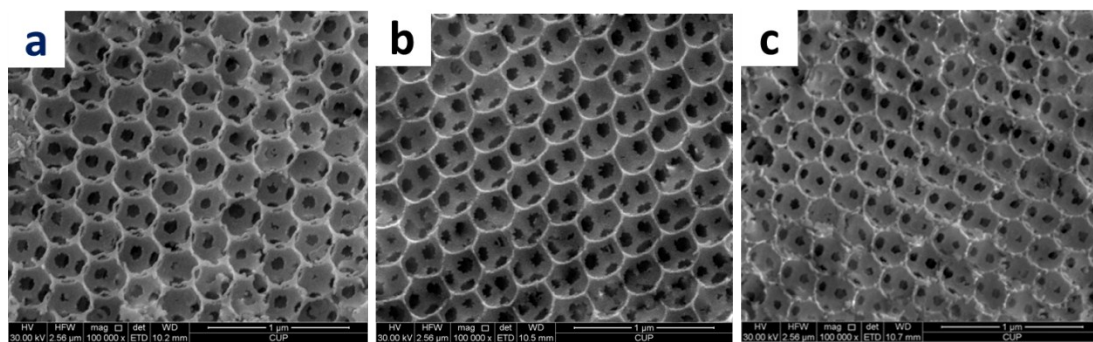

Figure S4. SEM images of 3DOM catalysts (a) 0.8% W/CeO<sub>2</sub> (b) 0.8% W/ZrO<sub>2</sub> (c) 0.8% W/Ce<sub>0.8</sub>Zr<sub>0.2</sub>O<sub>2</sub>

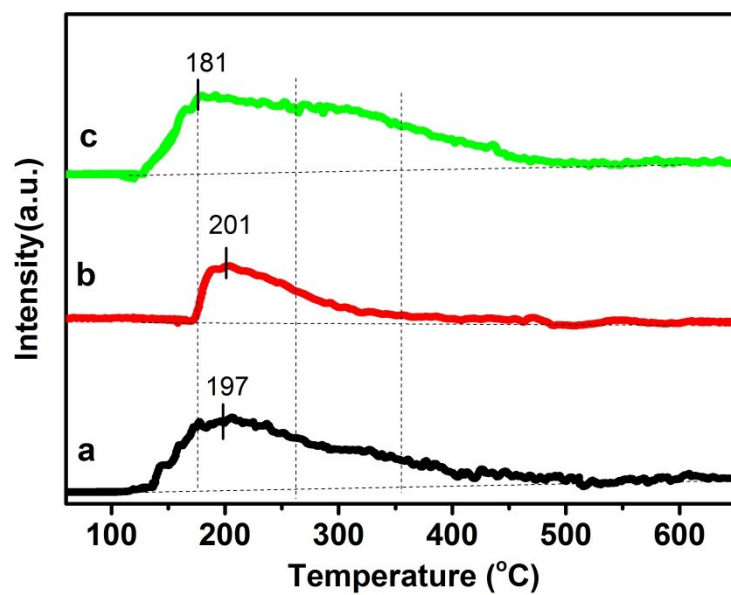

Figure S5. NH<sub>3</sub>-TPD curves of 3DOM catalysts (a) 0.8% W/CeO<sub>2</sub> (b) 0.8% W/ZrO<sub>2</sub> (c) 0.8% W/Ce<sub>0.8</sub>Zr<sub>0.2</sub>O<sub>2</sub>
